# Supplementary material for: Bacterial Proliferation: Keep Dividing and Don't Mind the Gap
Source: PubMed Central journal article supplement (PMC4699847; doi:10.1371/journal.pgen.1005757), 2015-12-29

**A.**

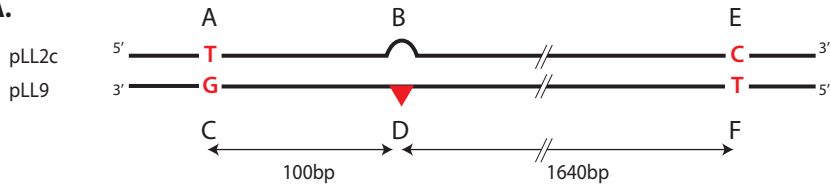

Strand loss

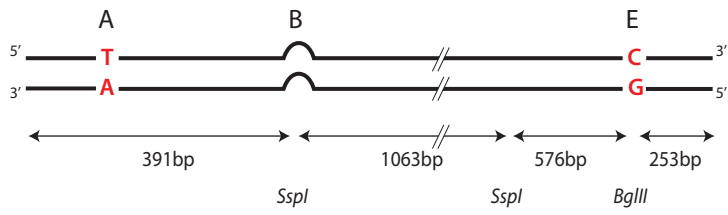

White colonies: markers A+B+E

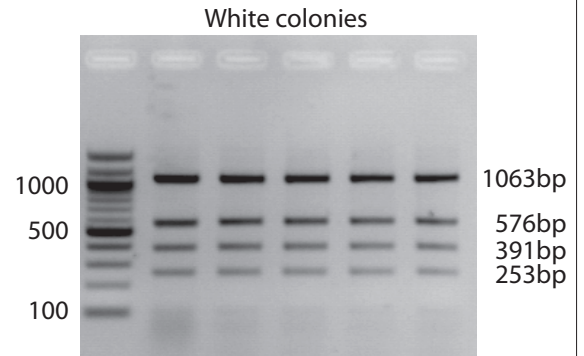

**B.**

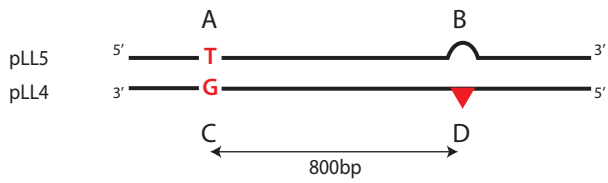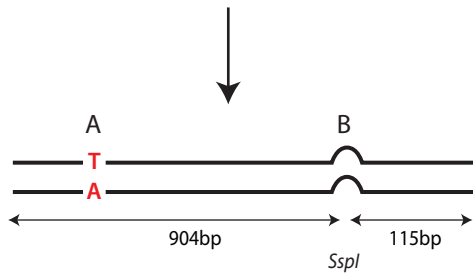

White colonies: markers A+B

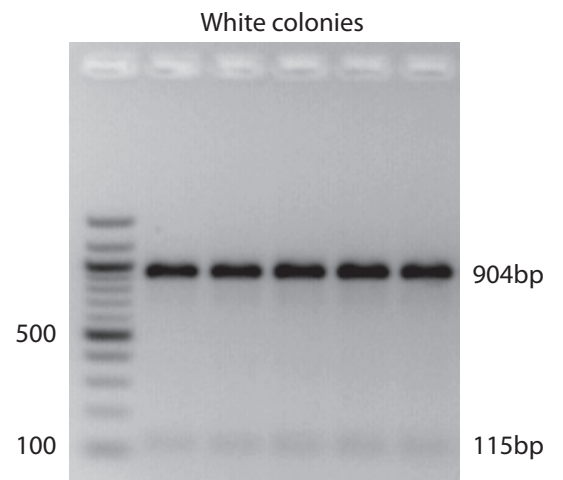

Supplement: pgen.1005757.s002.pdf [file pgen.1005757.s002.pdf]
