# Supplementary material for: Bacterial Proliferation: Keep Dividing and Don't Mind the Gap
Source: PubMed Central journal article supplement (PMC4699847; doi:10.1371/journal.pgen.1005757), 2015-12-29

S4 Fig

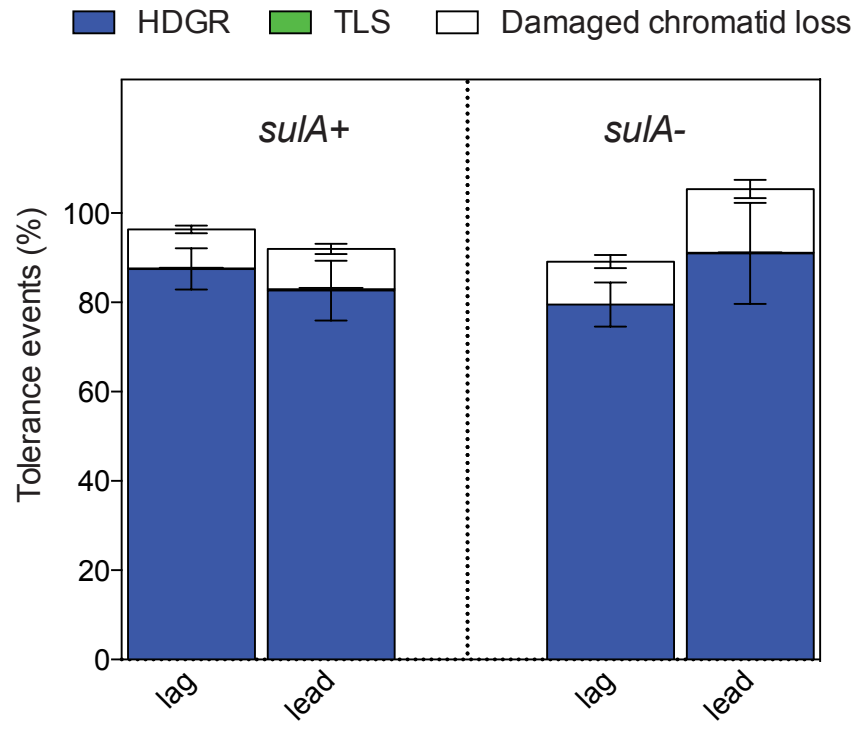

Supplement: pgen.1005757.s004.pdf [file pgen.1005757.s004.pdf]
